# Supplementary material
Source: PubMed Central journal article supplement (PMC6926444)
Supplement: supp_RA119.009435_152956_3_supp_423229_q0wpym.pdf [file supp_RA119.009435_152956_3_supp_423229_q0wpym.pdf]

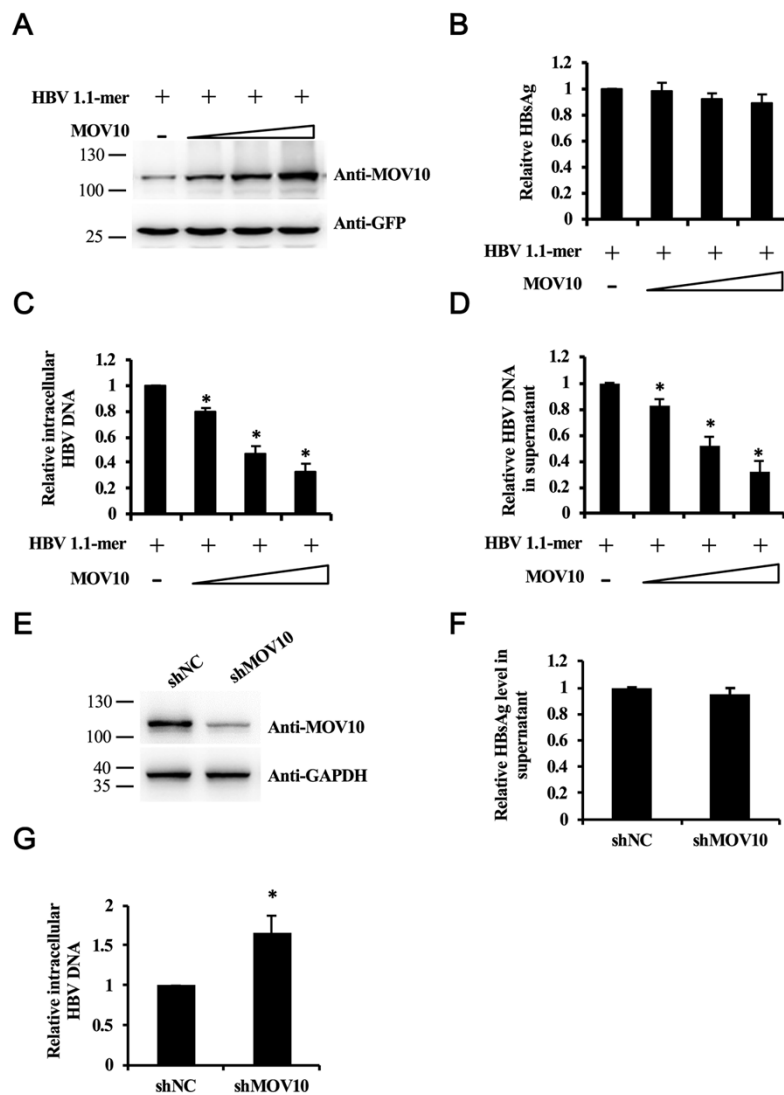

**Supplementary Figure 1.** MOV10 inhibits HBV replication in Huh7 cells. (A) Different amounts of MOV10-expressing plasmids (0.25  $\mu$ g, 0.5 $\mu$ g, 1 $\mu$ g) were co-transfected into Huh7 cells together with HBV constructs pCMV-HBV (0.5 $\mu$ g), and with constant amount of GFP-expressing plasmids (0.1  $\mu$ g) to normalize the transfection efficiency. The expression of MOV10 protein (top) and GFP proteins (bottom) were detected by western blots. (B) The culture medium of transfected cells was tested for HBsAg with ELISA. Intracellular (C) and extracellular (D) HBV DNA were extracted and measured by qPCR. (E) Levels of endogenous MOV10 protein in control and stable MOV10-knockdown Huh7 cell lines were examined by western blots. (F) The effect of MOV10 silencing on released HBsAg level. (G) The effect of MOV10 silencing on intracellular HBV DNA level. The control and stable MOV10-knockdown Huh7 cell lines were transfected with the replication-competent HBV construct. Intracellular HBV DNA was extracted and measured by qPCR. Results from three separate experiments are shown as mean values  $\pm$  SD. \*,  $P < 0.05$  (Student  $t$  test).
